# Supplementary material
Source: publisher site journal article supplement (https://www.dovepress.com/article/267066)
Supplement: Supplementary file 1 [file get_supplementary_file.php]

**Figure S1.** Flowchart of the selection of study participants.
